# Supplementary material for: The Genomic Diversity and Phylogenetic Relationship in the Family Iridoviridae
Source: Viruses. 2010 Jul 15;2(7):1458–75. doi: 10.3390/v2071458 (PMC3185713; doi:10.3390/v2071458)
Supplement: Supplementary file 2 [file viruses-02-01458-s002.xls]

## Sheet: Sheet1
Supplementary table 1: Unique repeats found in FV3, STIV, TFV, EHNV, and ATV
	FV3				STIV				TFV				EHNV				ATV
Sequence	Indices	Period size	Copy number	Match identity	Indices	Period size	Copy number	Match identity	Indices	Period size	Copy number	Match identity	Indices	Period size	Copy number	Match identity	Indices	Period size	Copy number	Match identity
UNIQUE REPEATS
ggacct ccg	22955--22988	9	3.8	96
agtcttccg gag	19862--19890	12	2.4	100
tacta ttgtaagat	11486--11527	14	3	96
aatatat tatctctc	84594--84624	15	2.1	100
gtctgag gcagaata	75384--75453	15	4.7	100
cttaag atagtaaaga	100295--100383	16	5.6	100
cct gcggcgggtc tccca	95418--95484	18	3.7	100
ccccaacg ggacatcgca gag	39863--39949	21	4.1	100
acgc cctgcccagc agcagca	96967--97130	21	7.8	97
tcagg ctgcgcttgc tgctgccgt	54876--54956	24	3.4	100
aga aagtctccat ctaggtctcc agtg	39128--39193	27	2.4	100
gctg gtgcagctgg tgcctgtcca aaggatggga agacagaggt gggcttgaag ggtgtaaatc ctgtaaaggc tggtgccttt gcagtcactg ctggtgctgg tgtagctggt gctggtgta	51217--51443	123	1.8	99
gca gga					43198--43222	6	4.2	100
g aggtgagtat					99849--99882	11	3.1	100
tactatag taagat					11243--11282	14	2.9	100
gcgggtc tcccacctgc g					95254--95296	18	2.4	100
gc tggtgccttt gcagtcact					51139--51188	21	2.4	100
cgtcctgctc agcagcagca c					96781--96922	21	6.8	100
ggac ctccgggacc tccgggtcct cct					22667--22718	27	1.9	96
tctct ggcgagagag tctttgggga gagaa					93066--93178	30	3.8	98
agaaagtctc ccagaaagtc tccagcagcc aaactccaag ctggagatag accagcttcc atgaacattt gcaagaatct gcccaagcag aggctggtgg acattgccac agagatggga atagacctga acagagagtc agacggtaaa ccaaagacca aagaccagct gtgcgcagat atcatgggag gcgctgggag aaagtctccc agaaagtctc cc					38641--39108	222	2.1	100
cctcctcag									53282--53317	9	4	100
c gacggggt									72830--72868	9	4.3	96
gct gctctt									53318--53449	9	14.7	100
aagt ctccatcc									37197--37229	12	2.8	100
cgggagtg ataa									103293--103350	12	4.8	100
ttca gaagattctc t									64137--64173	15	2.5	95
ctccacat ctttact									69173--69213	15	2.7	96
tctta agctaatagt a									58996--59037	16	2.6	96
tatcttaaga tattac									76731--76773	16	2.7	100
gt ctcccacctg cggcgg									94009--94047	18	2.2	100
gcaacgc cctgctcagc agcctca									95563--95731	24	7.2	96
aa gtctccatcc aagtctccag ctgggaga									37209--37276	30	2.3	100
tagcgagag ggtctttggg gagagaatct c									91832--91910	30	2.6	100
ggagt gggaggagtg gagggagtga gaggagtgag a									96--219	36	3.4	95
ggtga cttactcttc acaggggtct tacgcttcac t									50996--51279	36	7.9	96
tctataaatg tcgttacatc tcactcttgt tctgagcgga aaaatcttaa gatagtcgta gag									98920--99065	63	2.4	96
tccacattt ttactctcct aaaccattat agtgagatac tttctgagag ataatacatc ttac									62882--63108	63	3.6	98
gtagtt cgttacaacc cgacgctctt taacgggttg cagtaatacg ccgaccactc ttgacggggc ttgatcacgg tgatcttg									64295--64463	84	2	97
ctggtgcctg tccaaaggat gggaagacag aggtaggctt gaagggtgta aatcctgtaa aggctggtgc ctttgcagtc actgcttgtg									49831--50006	90	2	100
agaaa gtctcccaga aagtctccag cagccaaact ccaagctgga gatagaccag cttccatgaa catttgcaag aatctgccca aacagaggct ggtggacatt gccacagaga tgggaataga cctgaacaga gagtcagacg gtaaaccaaa gaccaaagac cagctgtgcg cagatatcat gggaggcgct gggagaaagt ctccc									37266--37708	210	2.1	100
cccaggggt													89672--89707	9	4	100
ctcagg ctg													102485--102558	9	8.2	95
caaaacc cgg													118974--119011	10	3.8	96
atactca cctc													18464--18508	11	4.1	100
cagtctctt ta													101362--101389	11	2.5	100
gcagacac cacg													6073--6100	12	2.3	100
tctccagct aga													86862--86890	12	2.4	100
tacga tagtatc													105196--105229	12	2.8	100
tatcgta agatac													48184--48208	13	1.9	100
ataaagtctt aag													111021--111045	13	1.9	100
tgaga gaaggtct													4836--5051	13	16.6	98
tactatcgt aaga													65032--65063	13	2.5	95
gtct taagataaa													110916--110949	13	2.6	95
tactatctc aagat													25762--25802	14	2.9	100
ag atctttatcc tg													85669--85770	14	7.3	98
ggagtg ggcttagga													105--175	15	4.7	100
ttggga ggagtgggt													225--262	15	2.5	100
aagagt gctcctcgc													9005--9062	15	3.9	100
gaagac tttctttca													27595--27674	15	5.3	100
t ctttcctgag actt													34960--35016	15	3.8	100
tttctcctct aggac													35291--35405	15	7.7	100
aat cttctgaaag ag													58968--58996	15	1.9	100
caggac cttccacca													82925--82953	15	1.9	100
gtctccagtg agaaa													87431--87469	15	2.6	100
tct cgcaggagac tt													113588--113741	15	10.3	100
t gctggtgcag ctgg													98810--98896	15	5.8	97
ctatcagaag atatta													121251--121568	16	19.9	100
atg gtctgagaca gaa													122418--122714	16	18.6	100
tgtgat agcagtatcc													124235--124371	16	8.6	100
tatc ttacgatagt ag													28857--29424	16	35.4	99
a catctcaaga taagat													14430--14701	17	16	100
tct gagagaatac aaac													98338--98392	17	3.2	100
agactt tatatctctc a													124515--124657	17	8.4	98
tcttctgaa agaaatata													25082--25203	18	6.8	100
gtca tcagacggca ctca													25437--25554	18	6.6	100
tgccggtga ctgtctcct													113942--113983	18	2.3	100
a gaaagtctcc cgctgcg													87120--87205	18	4.8	98
ag agagtatagg agagat													88059--88102	18	2.4	96
gac tttctcttga cagga													100348--100409	18	3.4	95
tagagtat cttaagatag t													41743--41971	19	12.1	99
gcagg acgctgctgc tgctgg													21566--21627	21	3	100
agcga gagatggtcg aggcga													84376--84447	21	3.4	100
caaag ggagacgcgg gtctccccgg ag													14966--15029	27	2.4	100
gctgc tgctcctctt gctgttccac aacagcctcc tcag													102556--102730	39	4.5	100
gacaagag tttgtgagac aaaagtcttg gacaaaagtc ttg													73743--73849	40	2.6	97
tctctcagac taaatctttc agactatttc tctcatacaa tc													119741--119850	42	2.6	97
tctt tctcgctaag attttatctc tcagatcttt atctctctca ga													73977--74108	46	2.8	95
tatctt gtgatactat atctttcaga ctatatctta tgagaactta tcttgagaga ta													119485--119623	59	2.4	96
aatat cttaagataa atctttagac ataatatctt tagatagaaa tctttactct cattcccttt cagtcta													69986--70143	72	2.2	100
atatcttgt gatactatta tctttcagac tatatcttat gagaacttat cttgagagat atatcttgtg atacta													119542--119682	75	1.9	100
tatc ttaagatgtt acgccacatt tttactctcc ttaaagttcg agagagtaaa agtatcttat gatagtaatc ttaaagctaa ta													41957--42167	86	2.5	99
at tttaggataa gaaggagatg tagcaacatt tatagaatct ataaatgtgg atgtctttag tctctttcag aagactttat cttaagat													10549--10752	90	2.3	97
agattccta taaatgttgg tacatctcct tcttgtcctg aaactttgtg agataaagtc ttgagagaga atatcttctg aaagagatct taagatatcc acatttat													37682--37934	106	2.4	98
tctttcagag agaa																	34561--34592	14	2.3	100
g cactaactgc tgga																	82360--82388	15	1.9	100
agtat cttaagataa t																	55346--55405	16	3.8	97
a tatcttctga aataat																	93400--93437	17	2.2	95
tctta agatagttag agta																	34606--34656	19	2.7	96
tgc tggagcacta actgctgg																	82368--82412	21	2.1	100
agagtc ccaacgggac atcgc																	70925--70994	21	3.3	97
c tcctgctgct gctctgcagg																	86210--86308	21	4.7	100
tgctg ctgctggaca gggcgt																	17946--18125	21	8.6	97
agaaag tctccagtta gatcccct																	70275--70321	24	1.9	95
aggtggatgg ctgtgctggt tcaaacatgg agg																	82241--82339	33	3	100
gctggtg ctggagcact aactgctggt gcagctggtg ctggtgca																	82384--82559	45	3.9	96
gagaa agtctcctgc taggtctccg agaaggtctc catccaagtc tcc																	69416--69559	48	3	100
ccagtta gatcccctag aaagtctcca gtgagaaagt ctccagttag atcc																	70194--70297	51	2	96
gctgctg ctgctggaca gggcgttgct gctgctgcac agggcgttgc tgctgctgca cagggc																	17944--18125	63	2.9	97
gagaa ggtctccatc caagtctcca gctgtaagaa agtctcccgc tgggagaaag tctcctagaa agtctcccgc tgt																	69536--69763	78	2.9	99
agaaagtc tcctagaaag tctcccgctg tgagaaagtc tccagcagcc aaactccaag ccggagatag accagcttcc atgaacattt gcaagaatct gcccaagcag aggctggtgg acattgccac agagatggga atagacctga acagagagtc agacggtaaa ccaaagacca aagaccagct gtgcgcaaat atcatgggag gtgctggg																	69753--70195	216	2.1	100
