# Supplementary material for: The Genomic Diversity and Phylogenetic Relationship in the Family Iridoviridae
Source: Viruses. 2010 Jul 15;2(7):1458–75. doi: 10.3390/v2071458 (PMC3185713; doi:10.3390/v2071458)
Supplement: Supplementary file 3 [file viruses-02-01458-s003.xls]

## Sheet: Sheet1
Supplementary table 2: Conserved and unique repeats found in GIV and SGIV
	GIV				SGIV
Sequence	Indices	Period size	Copy number	Match identity	Indices	Period size	Copy number	Match identity
CONSERVED REPEATS
agt ttgggc	12668--12719	9	5.8	100	23472--23505	9	3.8	100
g gctgtgaagt agga	20850--20955	15	7.1	100	31605--31635	15	2.1	100
tccaggcc ccccaggacc	90693--90728	18	2	100	102058--102093	18	2	100
gccagga cccaaggggc t	40024--40074	18	2.8	100	50701--50751	18	2.8	100
aggg ctcagggaca gcttgtagac gc	100027--100499	26	18.2	100	111355--111749	26	15.2	95
ccaat cgttcctcaa cctctttggg ggtttgtcta attttaggct tggcgc	346--448	51	2	98	11054--11156	51	2	96
g actgcctctg ggcctcctgg ggctagcggg cctcttgtcc ctcgacctct cgg	1090--1330	54	4.5	99	11798--12126	54	6.1	99
UNIQUE REPEATS
ctgggcc tc	1314--1349	9	4	96
tcccg gtgg	30836--30875	9	4.4	100
cc accgtagcgc cct	48149--48432	15	18.9	100
tt tcatgctaaa tagcg	127569--127605	17	2.2	95
cac ccaggagccc tcttcgcccc acgc	48468--48538	27	2.6	100
t cttgcggggc tctttctaga ggtaggactc ttgcg	7100--7360	36	7.3	99
ccc gagccagagg gcaacgggac ctccaccgag tcctccaccc ctcccccgaa gcccgaggtc	88678--88880	63	3.2	100
tcca ccgtagcgcc c					58827--58871	15	3	100
tgctaaatag tgtttca					138581--138629	17	2.9	100
gg gcccgggagg tcctcg					7019--7062	18	2.4	96
agaggcttcc tcgaaggccg a					123751--123881	21	6.2	100
cccc acgccaccca ggagccctct tcg					58907--59192	27	10.6	100
ggtgggact cttgcgtctt gtgggagttt ttcgtct					17912--18143	36	6.4	96
gc ccgaggtccc cgagccagag ggcaacggga cctctcccga gtcctccacc cctcccccga a					99529--100248	63	11.4	100
