# Supplementary material for: The Genomic Diversity and Phylogenetic Relationship in the Family Iridoviridae
Source: Viruses. 2010 Jul 15;2(7):1458–75. doi: 10.3390/v2071458 (PMC3185713; doi:10.3390/v2071458)
Supplement: Supplementary file 4 [file viruses-02-01458-s004.xls]

## Sheet: Sheet1
Supplementary table 3: Conserved and unique repeats found in OSGIV, RBIV, and ISKNV
	OSGIV				RBIV				ISKNV
Sequence	Indices	Period size	Copy number	Match identity	Indices	Period size	Copy number	Match identity	Indices	Period size	Copy number	Match identity
CONSERVED REPEATS
tgcag gggccgctca ggcaagtcct ct	56544--56605	27	2.3	97	56236--56297	27	2.3	97
accacca ccactgtggc acctacaaca	21975--22048	27	2.7	95	21974--22047	27	2.7	95
cac caccttacca gccgcctgct attcccccca	106749--106812	33	1.9	96	106318--106381	33	1.9	96
c aatttgcatc aagtgacttt atttctacat tgtattg	93667--93742	38	2	100	93160--93235	38	2	100
ggcac cggagatggt ggtcgcgctg gcaccggaac tggtacc	18727--18806	42	1.9	97	18726--18805	42	1.9	97
tag cggcgacccc cgcctgttag gctaagaagg gtcgccacgt tgcagagggc ctcccttggt tgtccc	52385--52559	69	2.5	97	52078--52252	69	2.5	96
UNIQUE REPEATS
aca ggcccgacgc gtaccacagg cccgacgtgt accacaggcc cgacgcgcac cacaggcccg acgtgtacca caggcctg	24458--24639	81	2.2	100
cacctgta caatgcatgt gtgagaatca aaatgtgcaa cactacagtg gtataacaga ccgacgtgca ggagatatca ccatacgagc ctccaa	89243--89432	94	2	100
acaggccc gacgcgtacc acaggcccga cgtgtaccac aggcccgacg cgcaccacag gcccgacgtg taccacaggc ctgacaggcc cgacgcgtac cacaggcccg acgcgtacca caggcccgac gcgtacc	24323--24617	135	2.2	98
gaaga gatgtccata tgtc					66776--66812	19	1.9	100
caaggcg ctcctggccg cct					69064--69104	20	2	100
ct ccaacaggcg acagtatgca tcattcttct gggcgtgcat tggcacaggc ttaacagg					101139--101255	60	2	100
atta tagctgttgt actcattgtg tgcaacacac atgggcctgt acggctgctt gttgcaa					14136--14258	61	2	100
tg gtcaatatga tgttactacc actgaaccat gagtgctaat cacta									22099--22194	47	2	100
gacgc gtaccacagg cct									23446--23484	18	2.2	95
gacg cgtaccacag gcct									23617--23655	18	2.2	95
a gggtcgccac gtcgcagagg aacacgagcc tcccttgttt gtctttggtg gcgaccccgc ctgttgcggc taag									51470--51612	75	1.9	97
gctgcgt agtggatgtc ctggaccatc gtggctacg									52284--52356	36	2	97
ga tggcagcggt gcgtcggttc caacggta									86499--86556	30	1.9	96
