# Supplementary material for: The Genomic Diversity and Phylogenetic Relationship in the Family Iridoviridae
Source: Viruses. 2010 Jul 15;2(7):1458–75. doi: 10.3390/v2071458 (PMC3185713; doi:10.3390/v2071458)
Supplement: Supplementary file 5 [file viruses-02-01458-s005.xls]

## Sheet: Sheet1
Supplementary table 4: Unique repeats found in LCDV-1 and LCDV-C
	LCDV-1				LCDV-C
Sequence	Indices	Period size	Copy number	Match identity	Indices	Period size	Copy number	Match identity
UNIQUE REPEATS
ttaccaggt	29281--29312	9	3.6	95
atatata aatg	63334--63358	11	2.3	100
ccgtttagg tgatttaga	63032--63103	18	4	98
cggcaggcc catctaatct agcac	45222--45321	24	4.2	98
a atccacaagt gccttataac tac	44480--44606	24	5.3	99
ggttcggt ttgacaacgg cgcctggctt aacagcgg	80293--80438	36	4.1	99
at					25336--25388	2	26.5	100
tcctggta t					113273--113297	9	2.8	100
gtag tagctggctt ttgagtt					72377--72500	21	5.9	100
gaaaactt tgacctttga cctttgagtt tat					37163--37240	31	2.5	100
ttgagta acaacgggtt tttgagtagc ggtaggtgc					124334--124751	36	11.6	100
gatctaaa tctcctcgta gatctaaatc cccatctaaa c					161453--161607	39	4	100
ttgatctaaa gaaactttag aggaagcgtt gaaagaagta gatctatcgg ctaaggttaa agaagga					1--524	66	7.9	98
cccgaag ttcttaaaga tctcttgaaa gatgttaatt tagacgataa aattaccgat gctttgaaag atactgattt gactcgacaa attacagaag ctttaaaaac tgctgatcta gaagaacatg taaaaaaaga attgacg					185714--186250	144	3.7	100
