# Supplementary material for: The Genomic Diversity and Phylogenetic Relationship in the Family Iridoviridae
Source: Viruses. 2010 Jul 15;2(7):1458–75. doi: 10.3390/v2071458 (PMC3185713; doi:10.3390/v2071458)
Supplement: Supplementary file 6 [file viruses-02-01458-s006.xls]

## Sheet: Sheet1
Supplementary table 5: Unique repeats found in IIV-3
	IIV-3
Sequence	Indices	Period size	Copy number	Match identity
UNIQUE REPEATS
gtagcgagt acgaccgtaa ggga	262--325	23	2.8	100
ggtcgt actcgctact cccttac	1265--1390	23	5.5	100
ctcg ttacg	1387--1435	9	5.4	97
gattcagac agtgaagacg ac	4932--4973	21	2	100
aagact tgttgtggta	7035--7101	16	4.2	100
aatttttta atctttgttt taaagattaa aaaacaccat aaactatcga aacaacc	11062--11168	56	1.9	100
gcggtagc	23902--23936	8	4.4	100
cgagc gtaacgagta cgaccgttag ggagtagcga gtggcgcagc gtaa	24686--24819	49	2.7	100
tcg ctactccctt acggtcgtac	25497--25546	23	2.2	100
cgagcgtaa	33762--33801	9	4.4	100
ga gtagcgagta gg	33799--33825	14	1.9	100
ctcgctac g	35973--36003	9	3.4	95
tactc ccctgtggtc gtactcgt	36696--36744	23	2.1	100
gagtagtggg taacgagtac gaccgtaagg	43861--43956	30	3.2	100
agt agcgagcgta gctagtacga ccgtaaggg	53157--53247	32	2.8	100
attatggtt aatagaagca ataattctct agtacaatt	54222--54293	38	1.9	100
cggtcg tactcgctac tcccttacgg tcgtactccc tacgctcgtt a	55535--55630	47	2	95
aat ttcagtaacc aattcttgtg gttcagtcga gcttggaatt tcaggtgttg tagtttgtgg tgtggttgta ttta	57208--57368	78	2.1	98
ctcgtt acg	72085--72110	9	2.9	100
t agcgagtacg accgtaaggg ag	72329--72380	23	2.3	100
tatggtta taaaaagcac taattttctg ctacaattgg	72803--72885	38	2.2	100
tt atggtcaata aaagcaataa ctattctact agtacga	73299--73459	39	4.1	96
taaat ttcagagctc aaaatccgag ctgcaagttt tgaacgacac gcatcgcatt cgattcaaac tcaacggctt taaatttggg ctcgaaattt agacaagcga gactagtgca gcaaagacga gtgggtacag gttcaaacaa tagcaaagat ttatggttct gtagaagcaa taattttaca ctacaggtat tatggttctg tagaagcaat aatcatctat tccaattgtt atggttctac agaaccaata tgctacaact cttactacaa ccactactca ctacccgccc actactcgct actcgctacg ctcgctgcgg tcgtactcgt tacgctcgct actcgcttca actcttgt…	79596--81825	1062	2.1	98
c ctacccgcta	82060--82093	11	3.1	100
ct actacccact cgtctcg	82398--82440	19	2.3	100
ctc gtctcgctac g	82428--82474	14	3.4	100
cg actcactctt gagacgag	85809--85863	20	2.8	100
gtag cgagtacgac cgtaacgagc gtagcgagta cgaccgtaag gga	91747--91850	47	2.2	100
ga gtagc	91839--91868	7	4.3	95
aagggag tagcgagtac gaccgt	93374--93435	23	2.7	97
cgtcgta gcccg	96114--96166	12	4.4	97
tactcgc tatcggtcgt actcgc	110654--110724	23	3.1	100
gt agcgagtacg accgtaaggg a	110899--110952	23	2.3	100
cggtcgt actcgctact ccctactcgc tacgctcgct g	114614--114688	38	2	100
c tcgctactcc ctactcgcta cg	114660--114711	23	2.3	100
ctaccaac tgc	115043--115069	11	2.5	100
ctactcgct acgcg	129962--129988	14	1.9	100
tac tcgctactcc cttacggtcg	154428--154479	23	2.3	100
ctcgt tacgctcgtt acgctcgcta cg	154476--154528	27	2	95
tactc gctactccct tacggtcg	154876--154954	23	3.4	100
ctcgt tacg	154476--154524	9	5.4	100
ctcg ctacg	154947--154986	9	4.4	96
gtggt ccgccttgac ggcgaagatc ga	157106--157179	27	2.7	100
agc gagtagcgag cgc	159528--159562	15	2.3	95
ttgtagt agaaagctat tgcttatatt aaccataata a	159594--159780	38	4.9	95
gtagcgagt acgaccgtaa ggga	160352--160405	23	2.3	100
caccgtt tgca	175304--175339	11	3.3	96
ct cgttacg	176379--176409	9	3.4	100
gtagcga gtacgaccgt aaggga	177254--177441	23	8.2	98
acca ccgccaca	186557--186589	12	2.8	100
tgg ccgtgtcccc tc	187118--187163	15	3.1	100
ggtc gtactcgcta ctcccttac	190777--190856	23	3.5	100
ctcgttac g	190853--190901	9	5.4	95
