# Supplementary material for: The Genomic Diversity and Phylogenetic Relationship in the Family Iridoviridae
Source: Viruses. 2010 Jul 15;2(7):1458–75. doi: 10.3390/v2071458 (PMC3185713; doi:10.3390/v2071458)
Supplement: Supplementary file 7 [file viruses-02-01458-s007.xls]

## Sheet: Sheet1
Supplementary table 6: Unique repeats found in IIV-3
	IIV-6
Sequence	Indices	Period size	Copy number	Match identity
UNIQUE REPEATS
caacaa aataatcaac taact	16835--16901	21	3.2	95
t tctattttta attc	22260--22298	15	2.6	100
gtgttaa aattg	27184--27209	12	2.2	100
aacat taaaataat	30366--30393	14	2	100
a gagtatagta t	32550--32591	12	3.5	100
at aaaaaaataa tg	33599--33639	14	2.9	100
tttt aattttcatt t	34377--34416	15	2.7	96
ggtcttg gatta	34634--34664	12	2.6	100
gaacgacg acgaggg	42863--42903	15	2.7	100
ggagaac gacgacgg	42944--42972	15	1.9	100
ttaat gtttaaaaa	52346--52372	14	1.9	100
ttaattaat t	52412--52436	10	2.5	100
taatttt aaatatata	58434--58475	16	2.6	100
cctcaca caacttt	62954--62981	14	2	100
acccccagtt acaaa	67651--67698	15	3.2	100
aatccac caattcgtta t	67844--67884	18	2.3	100
tcacacatt tctttg	69202--69241	15	2.7	100
ttatt ttaagttat	69256--69285	14	2.1	100
tcatcagtt acg	71262--71340	12	6.6	100
at aaccatgaag aaaaac	73729--73768	18	2.2	95
aaaat taaatga	77426--77450	12	2.1	100
aga aaacgatgg	82568--82593	12	2.2	100
ca accaagattt ggatca	82919--82972	18	3	100
tacaa acaatctc	83196--83225	13	2.3	100
tttctatat tttcat	83302--83347	15	3	96
a taatttagaa gtttaag	85370--85412	18	2.4	100
ttttaaa caaaaatat	91324--91387	17	3.8	97
aaatcta t	91984--92011	8	3.5	100
tga atattttatt ta	92168--92201	15	2.3	100
ctcctag aagaagccca t	108154--108201	18	2.7	96
c agtcctgtac a	108350--108385	12	3	95
caccgagaag aagtccat	108541--108620	18	4.4	100
a gacgttcatc gagtcgttct	108840--108943	21	5	98
taa ttttgtaatt	110038--110064	13	2.1	100
g gaaac	110520--110546	6	4.5	100
ttcata tactta	117875--117918	12	3.7	100
at tatattatac ca	119139--119166	14	2	100
aaaga acattgttta gaaaaatatg gaagtgaata ctatattaac tcagatgcat ca	128006--128259	57	4.5	96
tttaatttat ttg	132031--132064	13	2.6	100
cgcctaa atttt	138354--138399	12	3.8	100
tatggtta aactttt	139983--140012	15	2	100
ttttatttc taaa	147812--147839	13	2.2	100
g accaggatta ggacctggag ttg	151659--151709	24	2.1	100
gaagatgt tatattaaag	159873--159911	18	2.2	100
ttttagttc taaata	162692--162727	16	2.3	100
ccaagga gaagcccaac aagaagc	162814--162901	24	3.7	96
gat gaagaatatg ga	166018--166060	15	2.9	100
atttt aaacttaaat	181716--181748	15	2.2	100
a gaagattttc aaga	182870--182951	15	5.5	100
gaagaaga tgaagat	182943--182971	15	1.9	100
t tttgtttg	191030--191059	9	3.3	100
aaa ttcatattat tc	192208--192253	15	3.1	100
t tggcaaatta ctattat	194090--194127	18	2.1	100
ttt attcattttt taa	204578--204615	16	2.4	100
