# Supplementary material for: The Genomic Diversity and Phylogenetic Relationship in the Family Iridoviridae
Source: Viruses. 2010 Jul 15;2(7):1458–75. doi: 10.3390/v2071458 (PMC3185713; doi:10.3390/v2071458)
Supplement: Supplementary file 8 [file viruses-02-01458-s008.xls]

## Sheet: Sheet1
Supplementary table 7: Repeats of all sequenced iridoviruses of with less than 95% match identity
FV3 repeats				STIV repeats				TFV repeats				EHNV repeats				ATV repeats				GIV repeats				SGIV repeats				LCDV-1 repeats				LCDV-C repeats				ISKNV repeats				OSGIV repeats				RBIV repeats				IIV-3 repeats
Indices	Period size	Copy number	Match identity	Indices	Period size	Copy number	Match identity	Indices	Period size	Copy number	Match identity	Indices	Period size	Copy number	Match identity	Indices	Period size	Copy number	Match identity	Indices	Period size	Copy number	Match identity	Indices	Period size	Copy number	Match identity	Indices	Period size	Copy number	Match identity	Indices	Period size	Copy number	Match identity	Indices	Period size	Copy number	Match identity	Indices	Period size	Copy number	Match identity	Indices	Period size	Copy number	Match identity	Indices	Period size
51186--51440	123	2.1	93	51068--51305	119	2	88	68779--68972	69	2.8	77	100060--100283	105	2.1	84	32616--32979	186	2	87	111782--112877	84	13	80	122638--123756	84	13.3	83	94311--94344	15	2.3	94	125065--125210	60	2.4	94	23690--23724	18	1.9	94	21804--22207	198	2	94	21689--22020	174	1.9	93	23961--23993	16
82295--82565	93	2.9	89	82066--82336	93	2.9	89	53434--53561	39	2.8	75	39907--40220	93	3.4	92	32586--32930	93	3.7	94	111404--112877	63	23.4	82	122638--123756	63	17.8	81	45294--45466	51	3.5	90	113491--113523	9	3.7	91	61947--62015	35	2	94	22005--22339	168	2	93	102603--102642	20	2	90	24320--24352	16
70357--70548	69	2.8	80	70132--70318	69	2.7	81	36269--36344	32	2.3	86	39907--40269	93	3.9	89	101334--101444	58	1.9	85	111362--112563	63	19.1	81	16021--16094	36	2.1	82	30471--30504	17	1.9	88	81844--81877	14	2.3	90	105170--105376	96	2.2	94	14439--14485	18	2.6	89	14480--14526	18	2.6	89	54592--54695	46
16726--16848	58	2.1	85	50855--51050	66	3	85	37209--37291	30	2.8	92	109558--109773	74	3	83	101513--101622	56	2	83	111341--112731	42	33.1	82	16006--16132	27	4.7	87	31183--31216	17	1.9	88	113085--113144	9	6.7	90	14341--14423	18	4.6	92	24240--24617	81	4.8	89	83480--83556	31	2.5	89	78882--80723	713
91069--91165	51	1.9	89	38527--38666	60	2.3	89	95--219	27	4.6	87	100147--100304	72	2.2	87	83575--83731	54	2.9	91	112727--112882	42	3.7	70	6885--6945	27	2.3	80	68885--68922	14	3	88	158089--158127	19	2.1	90	14354--14438	18	4.7	92	83860--83976	15	7.9	88	83507--83582	30	2.6	89	107549--107587	21
16755--16857	44	2.4	78	16483--16605	58	2.1	85	37763--37828	24	2.7	90	60620--60756	71	2	85	83580--83949	54	6.9	73	5256--5307	27	1.9	88	122629--123757	21	53.8	80	48166--48199	13	2.6	86	11097--11220	54	2.3	85	21318--21601	156	1.8	92	14364--14446	18	4.6	86	83480--83559	15	5.3	86	158671--158748	23
91102--91180	33	2.4	84	90842--90938	51	1.9	89	49507--49545	21	1.9	89	60632--60773	71	2	82	70200--70309	51	2.2	90	135988--136049	27	2.3	75	41205--41242	18	2.1	90	61000--61037	11	3.5	85	42547--42607	30	2.1	84	52291--52367	36	2.1	88	14364--14446	36	2.3	85	83480--83582	46	2.3	86	159805--159837	16
16741--16857	29	4.1	75	50861--51080	51	4.4	80	89568--89604	18	2.1	94	83553--83752	71	2.8	81	69597--69703	48	2.2	88	38905--38951	19	2.6	80	6831--6865	18	1.9	88	36997--37164	81	2.1	82	178930--178973	22	2.1	84	14341--14438	36	2.7	87	51070--51109	22	1.9	85	24015--24193	18	10.4	85	160158--160190	16
39182--39228	24	1.9	91	16512--16614	44	2.4	78	95530--95603	18	3.9	83	65108--65304	70	2.8	91	17866--18125	42	6.2	82	135935--135969	18	1.9	88	17895--17990	18	5.3	78	29611--29842	72	3.2	80	81844--81888	15	2.8	83	23357--23745	117	3.4	86	66312--66434	57	2.2	82	50763--50802	22	1.9	85	54224--54305	38
52815--52872	21	2.8	94	90875--90953	33	2.4	84	92070--92110	17	2.4	91	54216--54408	69	2.8	80	69665--69794	42	2.9	78	29687--29738	18	2.9	73	6885--6945	18	3.4	76	97126--97215	42	2.1	79	185628--185674	24	2	83	82670--82711	21	2	86	24187--24617	18	25.4	81	65995--66117	57	2.2	82	74006--74064	17
51430--51482	21	2.5	93	50840--51080	30	8.4	78	103613--103653	17	2.4	87	109818--110003	69	2.7	80	70241--70321	39	2.1	84					16009--16085	18	4.3	70	44689--44850	48	3.4	78	161435--161597	18	8.6	75	23519--23745	81	2.8	81	24359--24639	45	6.4	76	14423--14487	18	3.6	80	126976--127005	15
50914--50952	21	1.9	89	16498--16614	29	4.1	75	26937--26986	16	3.3	72	36084--36331	65	3.5	81	83676--83931	36	7.2	87					41489--41528	9	4.4	93	45230--45466	24	9.6	77					23402--23745	54	6.2	78	21690--22339	174	3.6	75	14414--14470	18	3.2	79	129891--129920	14
52774--52812	18	2.2	90	39124--39170	24	1.9	91	98811--98842	15	2.1	94	122700--122951	63	4.1	93	83672--84098	36	11.9	84																	23273--23557	36	7.7	74					24034--24316	27	10.5	77	158987--159034	16
91083--91180	18	5.8	71	18371--18416	21	2.2	92	104593--104623	15	2.1	93	33388--33502	58	2	94	57893--57976	32	2.7	94																	23330--23380	18	2.8	74					18723--18800	24	3.5	71	111684--111776	23
29134--29183	16	3.3	66	50739--50777	21	1.9	89	73808--73847	15	2.7	88	109727--109896	54	3.2	81	104490--104562	32	2.3	92																	23273--23719	81	5.6	73					14156--14258	33	3.3	63	55126--55213	31
100218--100249	15	2.1	94	51258--51305	21	2.4	89	103613--103660	15	2.9	84	99979--100229	54	4.7	76	104490--104572	32	2.6	88																	23379--23439	18	3.4	71									129151--129270	38
50979--51013	15	2.3	90	52630--52668	18	2.2	90	49572--49621	15	3.3	82	100096--100316	54	4.2	74	17883--17978	30	3	89																	23294--23745	27	16.4	70									25306--25398	39
51030--51233	15	13.5	87	90856--90953	18	5.8	71	83979--84039	15	4.1	70	124515--124674	51	3.1	92	30442--30498	30	1.9	88																	23285--23421	9	15.2	68									37034--37067	13
84588--84624	15	2.3	86	91003--91057	17	3.4	82	91836--91910	15	5	66	27777--27881	50	2.1	87	69569--69655	30	2.9	87																	23285--23745	45	10	68									55613--55643	9
38879--38928	15	3.5	73	28872--28951	16	5.3	64	64215--64245	14	2.3	94	94307--94395	44	2	93	61402--61478	30	2.6	85																													74143--74225	39
39145--39199	15	3.9	73	100010--100041	15	2.1	94	20794--20827	9	3.8	92	100051--100268	36	6.1	75	21841--21918	30	2.6	74																													91738--91850	24
93286--93330	15	3	73	84366--84396	15	2.1	93	96--220	9	13.9	85	100143--100355	36	6.2	73	69645--69793	30	5	72																													152862--152899	20
16726--16848	15	8.4	70	75146--75185	15	2.7	92	49777--49836	9	7.7	70	162--253	33	2.8	94	101598--101657	28	2.1	90																													157106--157209	27
85842--85902	15	4.1	70	50834--51050	15	14.9	83					100264--100409	33	4.2	73	96--174	24	3.3	94																													176660--176734	38
65557--65594	12	2.9	84	93064--93173	15	7.3	75					69896--69999	30	3.4	93	69416--69547	24	5.5	81																													33340--33389	23
65668--65710	12	3.5	79	16483--16605	15	8.4	70					100--262	30	5.2	88	70185--70273	24	3.6	72																													67394--67440	21
38867--38914	12	3.8	74	85614--85674	15	4.1	70					33190--33246	29	1.9	85	71979--72022	21	2.3	88																													53440--54592	313
54946--54978	9	3.7	91	11239--11275	14	2.4	73					73758--73849	27	3.5	86	17866--18124	21	12.3	85																													95902--96022	39
51036--51127	9	10.8	82	65612--65674	14	4.4	73					102485--102574	27	3.3	85	99025--99082	19	3.1	89																													95871--96022	75
41980--42026	9	5.7	80	65287--65324	12	2.9	84					35020--35135	27	4.2	72	21663--21706	18	2.4	92																													111368--111452	39
51316--51355	9	4.8	79	65398--65440	12	3.5	79					21435--21496	24	2.8	86	33066--33103	18	2.1	90																													153934--154029	39
51051--51233	9	22.9	74	22667--22718	9	5.8	90					113523--113600	24	3.3	85	24105--24140	18	1.9	88																													158661--158735	24
41971--42032	7	8	80									86807--86878	24	3	76	19612--19652	18	2.3	86																													55524--55616	23
												36127--36170	22	2	86	19658--19696	18	2.2	85																													119368--119514	62
												82874--82919	21	2.2	92	83817--84076	18	14.4	83																													152481--152526	23
												65481--65540	21	2.9	71	83754--83812	18	3.3	68																													154481--154535	27
												23014--23069	18	3.1	94	50943--50984	17	2.5	92																													160054--160133	38
												50863--50913	18	2.8	93	21586--21626	17	2.4	87																													160457--160553	39
												60224--60262	18	2.2	90	60828--60866	17	2.3	86																													3160--3379	108
												5243--5279	18	2.1	89	24105--24150	16	2.7	83																													95888--96011	36
												23021--23095	18	4.2	89	26100--26147	16	3	81																													123620--123822	63
												100022--100057	18	2	88	57720--57767	16	3	81																													167506--167587	33
												100087--100244	18	8.9	75	104487--104546	16	3.8	78																													177466--177550	39
												27753--27866	18	6.7	73	104506--104568	16	3.9	75																													93145--93179	9
												99976--100045	18	3.9	73	57893--57975	16	5.3	69																													95999--96106	33
												100147--100376	18	13.1	73	81742--81771	15	2.1	93																													129096--129174	14
												73960--73994	17	2.1	94	61185--61222	15	2.5	91																													156081--156251	93
												119413--119446	17	1.9	94	95877--95915	15	2.6	91																													178712--179323	333
												10425--10464	17	2.4	87	23646--23680	15	2.3	90																													189773--189804	9
												25014--25054	17	2.4	87	30442--30498	15	3.8	88																													2091--2161	24
												37633--37674	17	2.4	77	82404--82588	15	12.3	82																													25695--25769	23
												27793--27882	17	5.3	75	93143--93198	15	3.7	77																													95963--96080	54
												69793--69835	16	2.7	92	70208--70292	15	6.3	76																													156004--156221	93
												30711--30758	16	3	81	34920--34953	14	2.4	90																													160646--160722	24
												119779--119857	16	5.3	74	101598--101657	14	4.1	80																													43556--43640	39
												69896--69999	16	6.8	67	33133--33190	14	4.1	73																													53617--53715	38
												18305--18336	15	2.1	94	98106--98138	12	2.8	90																													53930--54028	38
												72953--73076	15	8.1	93	49991--50033	12	3.5	79																													60947--61019	11
												29561--29611	15	3.4	91	69432--69547	12	9.7	67																													129122--129219	28
												82928--82962	15	2.3	90	82495--82556	9	7.9	70																													160584--160686	31
												71605--71643	15	2.7	88																																	160655--160722	23
												35032--35081	15	3.3	85																																	154723--154810	39
												70069--70108	15	2.8	85																																	158648--158702	9
												69985--70024	15	2.9	82																																	176645--176730	38
												126922--126960	15	2.8	82																																	110648--110740	16
												73947--74108	15	10.5	81																																	167485--167572	33
												105--258	15	9.9	79																																	189591--189691	39
												59215--59260	15	3.1	73																																	90027--90874	322
												25348--25404	15	3.8	72																																	96053--96110	15
												35139--35202	15	4.3	72																																	129122--129248	14
												59203--59252	15	3.4	72																																	158720--158780	16
												75493--75589	15	6.7	70																																	25807--25918	39
												109504--109534	14	2.1	94																																	55114--55173	7
												58869--58945	14	5.4	78																																	160622--160741	9
												119729--119843	14	8.2	74																																	55135--55215	9
												40423--40480	14	4.1	73																																	114620--114704	7
												122885--122955	14	4.9	70																																	33316--33370	16
												73758--73849	13	6.9	86																																	53145--53264	16
												75546--75612	13	5.1	82																																	129911--130024	31
												75493--75588	13	6.6	76																																	160584--160660	7
												116351--116387	12	3.1	85																																	57184--57332	39
												59117--59159	12	3.5	79																																	55543--55626	15
												102498--102564	3	22.3	82																																	43870--43948	15
[truncated: 6 more columns]
